# Supplementary material for: Genome-wide target analysis of NEUROD2 provides new insights into regulation of cortical projection neuron migration and differentiation
Source: BMC Genomics. 2015 Sep 5;16:681. doi: 10.1186/s12864-015-1882-9 (PMC4560887; doi:10.1186/s12864-015-1882-9)
Supplement: Additional file 9: — This table lists the sequences of all primers used in this study. (XLSX 9 kb) [file 12864_2015_1882_MOESM9_ESM.xlsx]

## Sheet: E14_plos_score_ens.txt
	Additional file 9
	ChIP-qPCR primers
	Nhlh2_forward	CTCACGAACTTCACCCGCAC
	Nhlh2_reverse	AAATTGACTCCTCGGCCCTC
	Dlx2_forward	GACGGTTGCCTCCTTTCTTG
	Dlx2_reverse	GTCGAGTGCATATCAGCCAC
	Gsx2_forward	CAAAAGCCAGTTCTCTCCCG
	Gsx2_reverse	GGCTGGTGATGGTGATGATG
	Gad1_forward	CCAGGGATCGTGCAAGCAA
	Gad1_reverse	GTGGTCTTGGGGTCTCTACG
	Calb2_forward	ATGCGGGTAGGTATGCTTCG
	Calb2_reverse	CAGGGCGTTAGCTTGAAGGA
	Npy_forward	TCACTTGCTGGACTCAGGTTC
	Npy_reverse	ATGCAATCTGGGTTCCTGGT
	Fezf2_forward	GCTCTTTCAGTGCCCAGTTC
	Fezf2_reverse	TGCCCTGGGACTATGAAAGG
	Satb2_forward	GTTTCAGACAGACCGTGAGC
	Satb2_reverse	GCGAAAGATGTAGGGAGTGC
	Bcl11b_forward	CCAGAGCTGATACCCTGGAG
	Bcl11b_reverse	TCTCCTCCTTTTCCCTCTGC
	Cux1_forward	GGTGACCGATAGCTTGCATC
	Cux1_reverse	AGTCTCCTTACAGTCCAGCG
	Lrp8_forward	GTGAGTCTCCTTCTCCCGAG
	Lrp8_reverse	CATGATCCTGCTCTGTGTGC
	Cdk5r1_forward	GGAAGGCCACACTGTTTGAG
	Cdk5r1_reverse	CTTCTTCGCTGACACCGC
	RT-qPCR primers
	Fezf2_forward	TCCAAGACGCTGCTCAGTTA
	Fezf2_reverse	GTAGTAGAGAGAGCCGCTGG
	Satb2_forward	AGCAGTTGGATGGCTCTCTT
	Satb2_reverse	GATTATTCCTTGGGCCTGCG
	Bcl11b_forward	ACATTCCTCTGAGAACGGCA
	Bcl11b_reverse	CGCAGTACTCACATGTGTCG
	Cux1_forward	ACCCTTTCTCCTCCTTCAGC
	Cux1_reverse	TCACTCCATGCCAGCTTGTA
	Lrp8_forward	CTTGGTGTGGAGATGCGATG
	Lrp8_reverse	GTCCGCAGCTTAACTTCTCG
	Cdk5r1_forward	GGAAGGCCACACTGTTTGAG
	Cdk5r1_reverse	CTTCTTCGCTGACACCGC
	Primers for shRNA cloning into pSUPER-neo-GFP
	Neurod2 shRNA_f	GATCCCCAAGACAAGAGATTCTCGGATTCAAGAGATCCGAGAATCTCTTGTCTTTTTTTA
	Neurod2 shRNA_r	AGCTTAAAAAAAGACAAGAGATTCTCGGATCTCTTGAATCCGAGAATCTCTTGTCTTGGG
